# Supplementary material
Source: Springer Nature journal article supplement (https://www.springermedizin.de/resource/supplementary/12957_2014_1598_MOESM2_ESM.pdf/9563044)

Figure 2. Age-related trends in hormone receptor activity.

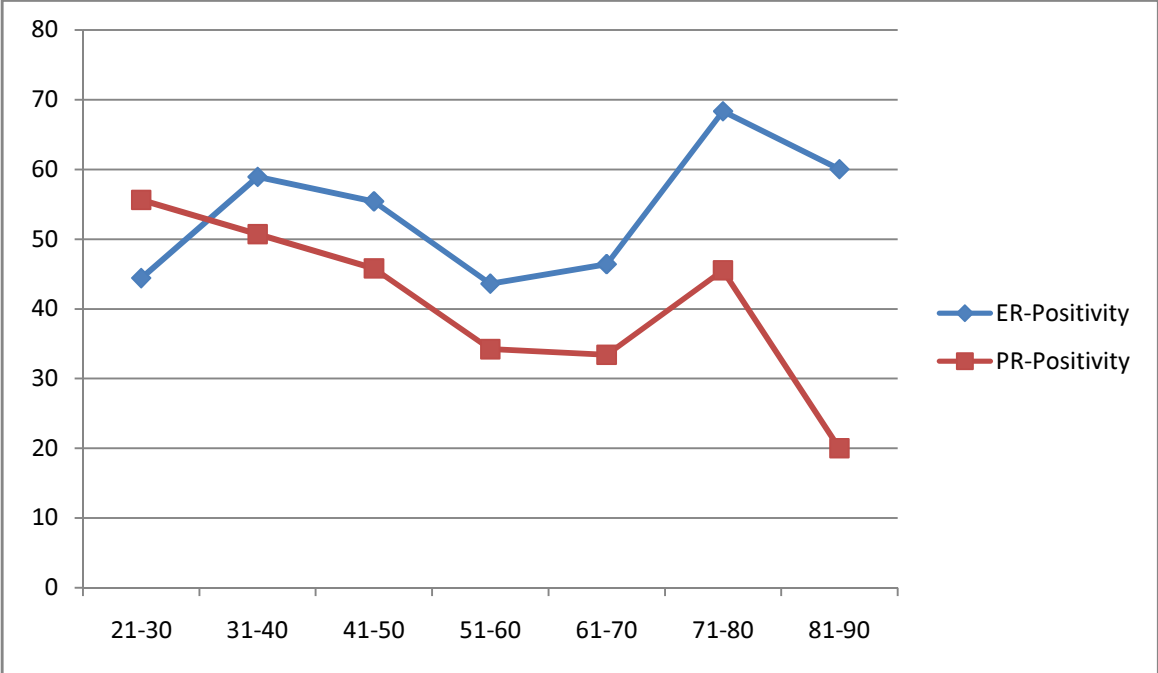

Supplement: MOESM2 [file 9563044]
